# Supplementary material for: CHD1L augments autophagy-mediated migration of hepatocellular carcinoma through targeting ZKSCAN3
Source: PubMed Central journal article supplement (PMC8520006; doi:10.1038/s41419-021-04254-x), 2021-10-15
Supplement: 41419_2021_4254_MOESM2_ESM.pdf [file 41419_2021_4254_MOESM2_ESM.pdf]

Table 1. Sequence information for siRNA used in described studies:

|                         |                                            |
|-------------------------|--------------------------------------------|
| <i>Paxillin</i> siRNA#1 | Sence 5'- GCAGCAACCUUUCUGAACUdTdT -3'      |
| <i>Paxillin</i> siRNA#1 | Antisence 5'- AGUUCAGAAAGGUUGCUGCdTdT -3'  |
| <i>ZKSCAN3</i> siRNA#1  | Sence 5'- GGUAGCUUCUAGGCUUACUdTdT -3'      |
| <i>ZKSCAN3</i> siRNA#1  | Antisence 5'- AGUAAGCCUAGAAGCUACCDdTdT -3' |
| <i>CHD1L</i> siRNA#1    | Sence 5'- CCUGCUGGAUAAGCUACUAdTdT -3'      |
| <i>CHD1L</i> siRNA#1    | Antisence 5'- UAGUAGCUUAUCCAGCAGGdTdT -3'  |
| <i>CHD1L</i> siRNA#2    | Sence 5'- CCAAACUGCAGCUCACCAAdTdT -3'      |
| <i>CHD1L</i> siRNA#2    | Antisence 5'- UUGGUGAGCUGCAGUUUGGdTdT -3'  |
| <i>ATG5</i> siRNA#1     | Sence: 5'- CCAUCAAUCGGAACUCAUTT -3'        |
| <i>ATG5</i> siRNA#1     | Antisence: 5'-AUGAGUUCCGAUUGAUGGTT-3'      |
