# Supplementary material for: CHD1L augments autophagy-mediated migration of hepatocellular carcinoma through targeting ZKSCAN3
Source: PubMed Central journal article supplement (PMC8520006; doi:10.1038/s41419-021-04254-x), 2021-10-15
Supplement: 41419_2021_4254_MOESM3_ESM.pdf [file 41419_2021_4254_MOESM3_ESM.pdf]

Table 2. Sequence information for real time PCR primers used in described studies:

|           |                                |
|-----------|--------------------------------|
| Paxillin  | F- GATTCATCCACCAGCAGCCTCAG     |
| Paxillin  | R- GCACGGAGAGCCAACACTGTC       |
| ZKSCAN3   | F- GCACGGAGAGCCAACACTGTC       |
| ZKSCAN3   | R- AGTGTGGATTCTGTGATGTTCAAGGAG |
| CHD1L     | F- GGGATTACCTACGCTCTTACC       |
| CHD1L     | R- CCTTGTCGCCTGCATATGTTAC      |
| 18S       | F- AACCCGTTGAACCCATT           |
| 18S       | R- CCATCCAATCGGTAGTAGCG        |
| MAP1LC3B  | F- CTGTTGGTGAACGGACACAG        |
| MAP1LC3B  | R- ACAATTTTCATCCCGAACGTC       |
| WIPI2     | F- GGACTCTGCCTCTCACGACT        |
| WIPI2     | R- ACCCAGGTCGTCTGTGTAGG        |
| SYNTAXIN5 | F- CAGACCCGTCAGAATGGAAT        |
| SYNTAXIN5 | R- TGGCAAATGTGTTGCTAAGG        |
| YKT6      | F- GGCCGAACTAGATGAGACCA        |
| YKT6      | R- AGACTGTGTTCCCAGCACCT        |
| RELA      | F- AGGCTCCTGTGCGTGTCTCC        |
| RELA      | R- TCGTCTGTATCTGGCAGGTACTGG    |
| DYNC2H1   | F- TCGAGCTCATGCTCTTCA          |
| DYNC2H1   | R- CCAGCCCGAAGATCTGATAA        |
| SAPK1     | F- AGATCCCGACAAGCAGTTA         |
| SAPK1     | R- GCTGCCCTCTTATGACTCCA        |
| COPZ1     | F- ACAAGACCCATCGGACTGAC        |
| COPZ1     | R- CATAGGAGCTGCCAATCACA        |
| ARL5B     | F- GTGGGATATTGGTGGTCAGG        |
| ARL5B     | R- AGTCGTTCCCTGTCAATGCT        |
| AKT1S1    | F- AGAAGCAGGAGGAGGAGGAG        |
| AKT1S1    | R- CAAACTCGTTCATGGTCACG        |
