# Supplementary material for: CHD1L augments autophagy-mediated migration of hepatocellular carcinoma through targeting ZKSCAN3
Source: PubMed Central journal article supplement (PMC8520006; doi:10.1038/s41419-021-04254-x), 2021-10-15
Supplement: 41419_2021_4254_MOESM4_ESM.pdf [file 41419_2021_4254_MOESM4_ESM.pdf]

Table 3. Sequence information for ChIP-PCR primers used in described studies:

|             |    |                                                           |
|-------------|----|-----------------------------------------------------------|
| ZKSCAN3 DP1 | F- | TGGTGTTTAAGGCACAGTGGGA                                    |
| ZKSCAN3 DP1 | R- | TGTCATGTGTTTACTGTCCTCCA                                   |
| ZKSCAN3 DP2 | F- | AGGACAGTAAACACATGACATAGCA                                 |
| ZKSCAN3 DP2 | R- | AGGTTCAAGCTCGGGACCTTC                                     |
| ZKSCAN3 DP3 | F- | GGTCCCGAGCTTGAACCTCA                                      |
| ZKSCAN3 DP3 | R- | CTTGAGGGACTGCAGCCTCA                                      |
| GAPDH       |    | Comes from the ChIP kit (Thermo Fisher. Catalog No.26156) |
